# Supplementary material for: Evaluating Different Extraction Approaches for GC-MS Based Metabolomics Analysis of the Giant Pandas’ Fur
Source: MDPI journal article supplement (doi:10.3390/toxics10110688), 2022-11-14
Supplement: s1 [file s1]

# Supplementary Materials: Evaluating Different Extraction Approaches for GC-MS Based Metabolomics Analysis of the Giant Pandas' Fur

Yang Yang <sup>1,2,3,4,†</sup>, Yanqiang Yin <sup>5,†</sup>, Xianglan Tang <sup>6</sup>, Yinyin Xia <sup>7</sup>, Jinya Zhang <sup>8</sup>, Chun Yan <sup>8</sup>, Weixuan Zhang <sup>8</sup>, Hua Zhang <sup>1,2,3,4,\*</sup> and Ting-Li Han <sup>2,3,4,6,\*</sup>

<sup>1</sup> Department of Obstetrics and Gynecology, The First Affiliated Hospital of Chongqing Medical University, Chongqing 400016, China

<sup>2</sup> Ministry of Education of China International Collaborative Joint Laboratory of Reproduction and Development, Chongqing Medical University, Chongqing 400000, China

<sup>3</sup> State Key Laboratory of Maternal and Fetal Medicine of Chongqing Municipality, Chongqing Medical University, Chongqing 400000, China

<sup>4</sup> Institute of Life Sciences, Chongqing Medical University, Chongqing 400000, China

<sup>5</sup> Chongqing Zoo, Chongqing 400050, China

<sup>6</sup> Department of Obstetrics and Gynecology, The Second Affiliated Hospital of Chongqing Medical University, Chongqing 400010, China

<sup>7</sup> School of Public Health and Management, Chongqing Medical University, Chongqing 400000, China

<sup>8</sup> School of Clinical Medicine, Chongqing Medical University, Chongqing 400000, China

\* Correspondence: zh2844@gmail.com (H.Z.); tinglinghan@cqmu.edu.cn (T.-L.H.)

† These authors contributed equally to this work.

**Table S1.** Number of identified metabolites and CVs of each biochemical compound class identified in giant panda furs comparing across eight different extraction methods.

| Biochemical Classes         | HCL+ACN |         | HCL+Hexane<br>-EtOAc 1 |          | HCL+Hexane<br>-EtOAc 4 |          | HCL+MeOH |          | NaOH+ACN |          | NaOH+Hexane<br>-EtOAc 1 |          | NaOH+Hexane<br>-EtOAc 4 |           | NaOH+MeOH |          |
|-----------------------------|---------|---------|------------------------|----------|------------------------|----------|----------|----------|----------|----------|-------------------------|----------|-------------------------|-----------|-----------|----------|
|                             | #       | CV±SD   | #                      | CV±SD    | #                      | CV±SD    | #        | CV±SD    | #        | CV±SD    | #                       | CV±SD    | #                       | CV±SD     | #         | CV±SD    |
| Alkanes                     | 1       | 12.4    | 1                      | 7.9      | 1                      | 12.2     | 1        | 3.4      | 1        | 14.7     | 1                       | 7.6      | 1                       | 40.7      | 1         | 9.9      |
| Amino acids                 | 18      | 5.2±7.5 | 18                     | 4.5±4.4  | 18                     | 4.2±4.8  | 18       | 3.4±3.2  | 16       | 4.8±2.3  | 17                      | 7.2±5.3  | 16                      | 24.1±14.0 | 16        | 5.5±4.9  |
| Amino acids and derivatives | 10      | 6.4±4.6 | 9                      | 6.1±3.4  | 9                      | 4.7±3.1  | 7        | 4.8±3.2  | 9        | 10.0±3.6 | 8                       | 14.0±8.6 | 8                       | 22.0±13.0 | 7         | 9.4±4.4  |
| Organic acids               | 14      | 9.9±5.1 | 15                     | 7.8±4.0  | 11                     | 10.8±5.3 | 12       | 11.0±5.0 | 15       | 12.1±6.8 | 8                       | 9.2±2.8  | 10                      | 32.0±13.7 | 15        | 9.2±5.6  |
| Saturated fatty acids       | 2       | 7.4±1.8 | 1                      | 5.0      | 1                      | 1.8      | 2        | 7.7±1.5  | 6        | 7.9±4.8  | 5                       | 6.1±2.8  | 6                       | 41.9±2.1  | 6         | 6.7±3.2  |
| Secondary metabolites       | 3       | 7.4±1.9 | 3                      | 9.0±1.9  | 3                      | 8.6±6.8  | 2        | 16.5±2.2 | 2        | 8.3±1.7  | 2                       | 9.3±3.4  | 2                       | 62.3±2.1  | 2         | 13.2±6.4 |
| Unsaturated fatty acids     | 2       | 9.2±5.9 | 2                      | 12.9±3.1 | 1                      | 10.4     | 1        | 13.4     | 2        | 4.7±3.4  | 2                       | 12.2±1.8 | 2                       | 29.1±12.5 | 2         | 5.7±1.9  |
| TCA cycle and derivatives   | 3       | 7.1±4.5 | 3                      | 7.8±3.9  | 3                      | 14.1±5.1 | 3        | 11.8±8.2 | 3        | 13.4±3.3 | 3                       | 10.2±1.9 | 3                       | 28.6±16.3 | 3         | 9.2±6.0  |

**Table S2.** The semi-quantitative log values of identified metabolites in giant panda furs across the eight different extraction methods.

| Name                                     | Classification6b            | HCL+ACN   | HCL+Hexane- | HCL+Hexane- | HCL+MEO   | NAOH+ACN  | NAOH+Hexane | NAOH+Hexane | NAOH+M    |
|------------------------------------------|-----------------------------|-----------|-------------|-------------|-----------|-----------|-------------|-------------|-----------|
|                                          |                             |           | EtOAc 1     | EtOAc 4     | H         |           | -EtOAc 1    | -EtOAc4     | EOH       |
| 10,13-dimethyltetradecanoic acid (C17_0) | Saturated fatty acids       | 3.95±0.06 | 3.84±0.02   | 3.88±0.01   | 3.94±0.02 | 4.62±0.02 | 4.65±0.02   | 4.72±0.20   | 4.85±0.03 |
| 1-Aminocyclopropane-1-carboxylic acid    | Organic acids               | 4.58±0.11 | 4.44±0.03   | 4.51±0.11   | 4.51±0.08 | 3.64±0.02 | 3.48±0.05   | NA          | 3.71±0.02 |
| 2,4-Di-tert-butylphenol                  | Organic acids               | 3.70±0.05 | 3.61±0.05   | 3.65±0.03   | 3.71±0.05 | 3.69±0.09 | NA          | 3.77±0.20   | 3.73±0.04 |
| 2-Aminoadipic acid                       | Organic acids               | 3.96±0.04 | 3.86±0.01   | 3.94±0.03   | 3.94±0.03 | NA        | NA          | NA          | NA        |
| 2-Aminobutyric acid                      | Organic acids               | 3.59±0.02 | 3.54±0.04   | 3.54±0.02   | NA        | 4.45±0.02 | 4.19±0.03   | 4.01±0.05   | 4.38±0.02 |
| 2-Aminophenylacetic acid                 | Organic acids               | NA        | NA          | NA          | NA        | 3.53±0.08 | NA          | NA          | 3.57±0.10 |
| 2-Hydroxyisobutyric acid                 | Organic acids               | NA        | NA          | NA          | NA        | 3.21±0.07 | NA          | NA          | 3.06±0.06 |
| 2-ketoglutarate                          | Amino acids and derivatives | 6.35±0.02 | NA          | 6.32±0.01   | 6.35±0.02 | NA        | NA          | NA          | NA        |
| 2-Oxadipic acid                          | TCA cycle and derivatives   | 3.42±0.04 | NA          | NA          | NA        | NA        | NA          | NA          | NA        |
| 2-Oxoglutaric acid                       | TCA cycle and derivatives   | 4.85±0.01 | 5.76±0.01   | 3.82±0.06   | 4.49±0.06 | 3.35±0.07 | NA          | NA          | 3.34±0.06 |
| 3-Methyl-2-oxopentanoic acid             | Organic acids               | 3.47±0.06 | 3.54±0.06   | 3.57±0.05   | NA        | NA        | NA          | NA          | NA        |
| 4-Aminobutyric acid (GABA)               | Organic acids               | NA        | NA          | NA          | NA        | 3.71±0.05 | 3.68±0.03   | 3.73±0.15   | 3.73±0.03 |
| 4-Hydroxyphenylacetic acid               | Organic acids               | NA        | NA          | NA          | NA        | 3.65±0.02 | 3.45±0.04   | 3.48±0.15   | 3.60±0.02 |
| 4-Hydroxyphenylethanol                   | Organic acids               | NA        | 6.10±0.01   | NA          | NA        | NA        | NA          | NA          | NA        |
| 4-Methyl-2-oxopentanoic acid             | Organic acids               | 4.26±0.05 | 4.29±0.03   | 4.28±0.06   | 4.30±0.04 | NA        | NA          | NA          | NA        |
| Alanine                                  | Amino acids                 | 6.52±0.01 | 6.45±0.01   | 6.47±0.01   | 6.47±0.01 | 5.85±0.01 | 5.58±0.01   | 5.32±0.01   | 5.81±0.01 |
| Asparagine                               | Amino acids                 | 4.19±0.15 | 4.11±0.06   | 4.14±0.09   | 4.28±0.05 | NA        | NA          | 3.43±0.17   | NA        |
| Aspartic acid                            | Amino acids                 | 6.54±0.01 | 6.49±0.01   | 6.51±0.01   | 6.54±0.01 | 5.57±0.03 | 5.40±0.01   | 5.03±0.16   | 5.53±0.02 |
| Benzoic acid                             | Organic acids               | 3.20±0.04 | NA          | NA          | 3.14±0.07 | 3.11±0.03 | NA          | NA          | 3.06±0.03 |
| Carbamic acid                            | Organic acids               | 3.64±0.06 | NA          | NA          | NA        | NA        | NA          | NA          | NA        |
| Caprylic acid                            | Organic acids               | NA        | NA          | NA          | NA        | NA        | NA          | 2.93±0.18   | NA        |
| cis-4-Hydroxyproline                     | Amino acids and derivatives | 4.79±0.02 | 4.77±0.04   | NA          | 4.81±0.02 | NA        | NA          | NA          | NA        |
| Citraconic acid                          | Unsaturated fatty acids     | 4.10±0.16 | 4.11±0.06   | NA          | NA        | 3.92±0.03 | 3.84±0.05   | 3.73±0.09   | 3.95±0.03 |
| Citramalic acid                          | Organic acids               | NA        | NA          | NA          | NA        | 3.85±0.02 | 3.80±0.03   | 3.77±0.14   | 3.89±0.02 |
| Citric acid                              | TCA cycle and derivatives   | NA        | 3.75±0.04   | 3.80±0.03   | NA        | NA        | 4.47±0.05   | 4.60±0.17   | NA        |
| Creatinine                               | Secondary metabolites       | 4.86±0.06 | 4.75±0.05   | 4.84±0.06   | 4.82±0.06 | NA        | NA          | 3.34±0.28   | NA        |
| Cysteine                                 | Amino acids                 | 5.52±0.03 | 5.37±0.07   | 5.45±0.03   | 5.52±0.03 | 5.23±0.01 | 4.75±0.04   | 4.32±0.22   | 5.23±0.02 |
| D_Citraconic acid                        | Unsaturated fatty acids     | 4.80±0.08 | 4.83±0.04   | 5.10±0.04   | 5.23±0.05 | NA        | NA          | NA          | NA        |
| D_Fumaric acid                           | TCA cycle and derivatives   | NA        | NA          | NA          | 3.35±0.08 | 3.69±0.04 | 3.69±0.04   | 3.52±0.04   | 3.69±0.02 |
| Dimethyl aminomalonic acid               | Organic acids               | 4.82±0.09 | 4.73±0.02   | 4.82±0.05   | 4.77±0.05 | 4.43±0.03 | 4.50±0.03   | 4.11±0.19   | 3.27±0.04 |
| DL-gamma-methyl-ketoglutarate            | Organic acids               | 4.11±0.03 | 3.93±0.03   | 3.92±0.05   | 4.05±0.01 | 3.49±0.07 | NA          | 3.57±0.12   | 3.56±0.07 |
| Fumaric acid                             | TCA cycle and derivatives   | NA        | NA          | NA          | NA        | NA        | NA          | NA          | NA        |
| Glutamic acid                            | Amino acids                 | 6.32±0.02 | 6.27±0.02   | 6.28±0.01   | 6.31±0.02 | 5.42±0.03 | 5.15±0.01   | 4.83±0.12   | 5.37±0.04 |
| Glutaric acid                            | Organic acids               | NA        | NA          | NA          | NA        | 3.35±0.04 | NA          | NA          | 3.29±0.02 |
| Glutathione                              | secondary metabolites       | 5.60±0.04 | 5.51±0.03   | 5.57±0.01   | 5.56±0.07 | 4.76±0.03 | 4.41±0.04   | NA          | 4.71±0.07 |
| Glycine                                  | Amino acids                 | 6.52±0.01 | 6.45±0.01   | 6.48±0.01   | 6.49±0.01 | 6.18±0.02 | 6.04±0.01   | 5.77±0.04   | 6.17±0.01 |
| Heneicosanoic acid (C21_0)               | Saturated fatty acids       | NA        | NA          | NA          | NA        | 4.05±0.02 | 4.14±0.01   | 4.18±0.17   | 4.37±0.02 |
| Histidine                                | Amino acids                 | 5.08±0.01 | 5.03±0.02   | 5.04±0.02   | 5.06±0.02 | 4.03±0.04 | 3.46±0.03   | NA          | 3.90±0.01 |

|                             |                             |           |           |           |           |           |           |           |           |
|-----------------------------|-----------------------------|-----------|-----------|-----------|-----------|-----------|-----------|-----------|-----------|
| Homocysteine                | Amino acids and derivatives | 4.63±0.03 | 4.63±0.02 | 4.62±0.02 | 4.62±0.01 | NA        | NA        | NA        | NA        |
| Hydroxybenzoic acid         | Organic acids               | 3.63±0.03 | 3.49±0.01 | 3.48±0.01 | 3.60±0.05 | 3.25±0.03 | NA        | NA        | 3.27±0.03 |
| Isoleucine                  | Amino acids                 | 6.67±0.01 | 6.63±0.01 | 6.64±0.01 | 6.65±0.01 | 4.69±0.01 | 4.39±0.06 | 3.99±0.05 | 4.63±0.03 |
| Lactic acid                 | secondary metabolites       | 3.96±0.05 | 3.87±0.03 | 3.89±0.03 | NA        | 5.09±0.04 | 4.64±0.03 | 4.03±0.29 | 4.96±0.03 |
| Leucine                     | Amino acids                 | 6.67±0.01 | 6.63±0.01 | 6.64±0.01 | 6.65±0.01 | 4.84±0.01 | 4.67±0.02 | 4.40±0.04 | 4.80±0.01 |
| Levulinic acid              | Organic acids               | 4.30±0.01 | 4.19±0.02 | 4.21±0.05 | 4.08±0.01 | NA        | NA        | NA        | NA        |
| Lysine                      | Amino acids                 | 6.35±0.02 | 6.29±0.02 | 6.32±0.01 | 6.35±0.02 | 4.84±0.01 | 4.41±0.03 | 3.98±0.12 | 4.81±0.01 |
| Malic acid                  | TCA cycle and derivatives   | NA        |
| Malonic acid                | Organic acids               | NA        | 4.03±0.05 | NA        | 4.10±0.05 | NA        | NA        | NA        | NA        |
| Margaric acid (C17_0)       | Saturated fatty acids       | NA        | NA        | NA        | NA        | 3.67±0.06 | 3.71±0.02 | 3.75±0.19 | 3.92±0.02 |
| Methionine                  | Amino acids                 | 5.59±0.01 | 5.55±0.01 | 5.57±0.01 | 5.57±0.01 | NA        | 4.26±0.01 | NA        | NA        |
| Myristic acid (C14_0)       | Saturated fatty acids       | NA        | NA        | NA        | NA        | 3.49±0.01 | 3.45±0.04 | 3.51±0.18 | 3.59±0.01 |
| N-(Carboxymethyl)-L-alanine | Amino acids and derivatives | 4.74±0.07 | 4.66±0.04 | 4.65±0.02 | NA        | NA        | NA        | NA        | 3.30±0.04 |
| N-Acetylcysteine            | Amino acids and derivatives | NA        | NA        | NA        | NA        | 3.40±0.03 | 3.86±0.09 | 3.76±0.03 | NA        |
| N-Acetylglutamic acid       | Amino acids and derivatives | NA        | NA        | NA        | NA        | 3.89±0.02 | 4.45±0.07 | 4.34±0.03 | NA        |
| NADP_NADPH                  | Organic acids               | 4.56±0.04 | 4.36±0.02 | 4.43±0.02 | 4.48±0.02 | 3.48±0.05 | 3.66±0.02 | 3.48±0.13 | 3.41±0.01 |
| Nicotinamide                | Organic acids               | NA        | 3.12±0.03 | NA        | 3.23±0.06 | NA        | NA        | NA        | NA        |
| Norleucine                  | Amino acids and derivatives | 4.91±0.02 | 4.81±0.01 | 4.82±0.01 | 4.89±0.01 | 4.13±0.04 | 4.02±0.04 | 3.87±0.05 | 4.16±0.05 |
| Norvaline                   | Amino acids and derivatives | 5.12±0.01 | 5.79±0.01 | 5.03±0.01 | 5.12±0.02 | 4.63±0.06 | NA        | 4.10±0.17 | 4.66±0.06 |
| O-Acetylserine              | Amino acids and derivatives | NA        | NA        | NA        | NA        | 3.35±0.08 | 4.10±0.13 | 4.33±0.07 | NA        |
| Ornithine                   | Amino acids and derivatives | 4.34±0.03 | 4.30±0.02 | 4.32±0.02 | 4.39±0.04 | 5.17±0.03 | 4.85±0.03 | 4.51±0.11 | 5.13±0.02 |
| Oxaloacetic acid            | TCA cycle and derivatives   | 4.10±0.02 | NA        |
| Pentadecanoic acid (C15_0)  | Saturated fatty acids       | NA        | NA        | NA        | NA        | 3.28±0.05 | NA        | NA        | 3.41±0.02 |
| Phenylalanine               | Amino acids                 | 6.29±0.01 | 6.24±0.01 | 6.26±0.01 | 6.28±0.01 | 5.04±0.01 | 4.93±0.01 | 4.47±0.12 | 4.99±0.01 |
| Proline                     | Amino acids                 | 6.92±0.01 | 6.91±0.01 | 6.92±0.01 | 6.92±0.01 | 6.22±0.01 | 5.94±0.01 | 5.60±0.03 | 6.16±0.01 |
| Pyroglutamic acid           | Amino acids and derivatives | 6.24±0.01 | 6.17±0.02 | 6.20±0.01 | 6.23±0.01 | 5.33±0.04 | 5.11±0.02 | NA        | 5.32±0.02 |
| Pyruvic acid                | Organic acids               | NA        | NA        | NA        | NA        | 3.01±0.12 | NA        | 3.10±0.24 | NA        |
| Serine                      | Amino acids                 | 5.79±0.01 | 5.67±0.01 | 5.72±0.01 | 5.76±0.01 | 5.09±0.02 | 4.75±0.09 | 4.60±0.06 | 5.00±0.08 |
| Stearic acid (C18_0)        | Saturated fatty acids       | 3.52±0.03 | NA        | NA        | 3.58±0.03 | 3.95±0.03 | 4.04±0.02 | 4.09±0.19 | 4.24±0.05 |
| Succinic acid               | TCA cycle and derivatives   | 4.10±0.05 | 4.07±0.04 | 4.10±0.08 | 4.01±0.01 | 3.99±0.06 | 3.88±0.03 | 4.01±0.17 | 3.97±0.02 |
| tert-Leucine                | Amino acids and derivatives | 5.82±0.01 | 5.76±0.01 | 5.78±0.01 | NA        | 5.16±0.03 | 4.66±0.06 | 4.28±0.13 | 4.92±0.02 |
| Threonine                   | Amino acids                 | 6.17±0.01 | 6.12±0.01 | 6.15±0.01 | 6.16±0.01 | 4.90±0.01 | 4.66±0.02 | 4.47±0.13 | 4.91±0.01 |
| trans-4-Hydroxyproline      | Amino acids and derivatives | 3.54±0.02 | 3.38±0.04 | 3.47±0.05 | NA        | 3.92±0.05 | 3.66±0.05 | 3.71±0.19 | 3.90±0.07 |
| trans-Cinnamic acid         | Organic acids               | NA        | 3.32±0.02 | NA        | NA        | NA        | 3.65±0.06 | 3.43±0.03 | 3.34±0.03 |
| trans-Vaccenic acid         | Unsaturated fatty acids     | NA        | NA        | NA        | NA        | 3.88±0.01 | 3.84±0.04 | 3.85±0.17 | 4.00±0.01 |
| Tryptophan                  | Amino acids                 | 5.13±0.02 | 5.07±0.01 | 5.08±0.02 | 5.28±0.01 | 4.66±0.01 | 4.52±0.03 | 3.98±0.14 | 4.56±0.01 |
| Tyrosine                    | Amino acids                 | 6.16±0.01 | 6.10±0.01 | 6.13±0.01 | 6.17±0.01 | 5.48±0.02 | 5.03±0.02 | 3.49±0.21 | 5.43±0.01 |
| Valine                      | Amino acids                 | 6.55±0.01 | 6.48±0.01 | 6.51±0.01 | 6.52±0.01 | 4.80±0.03 | 4.56±0.03 | 4.32±0.05 | 4.78±0.03 |
